# Supplementary figures and images for: Association between breastfeeding support and breastfeeding rates in the UK: a comparison of late preterm and term infants
Source: HighWire-hosted journal article supplement (doi:10.1136/bmjopen-2015-009144), 2015-11-01

Web Appendix: Figure 1

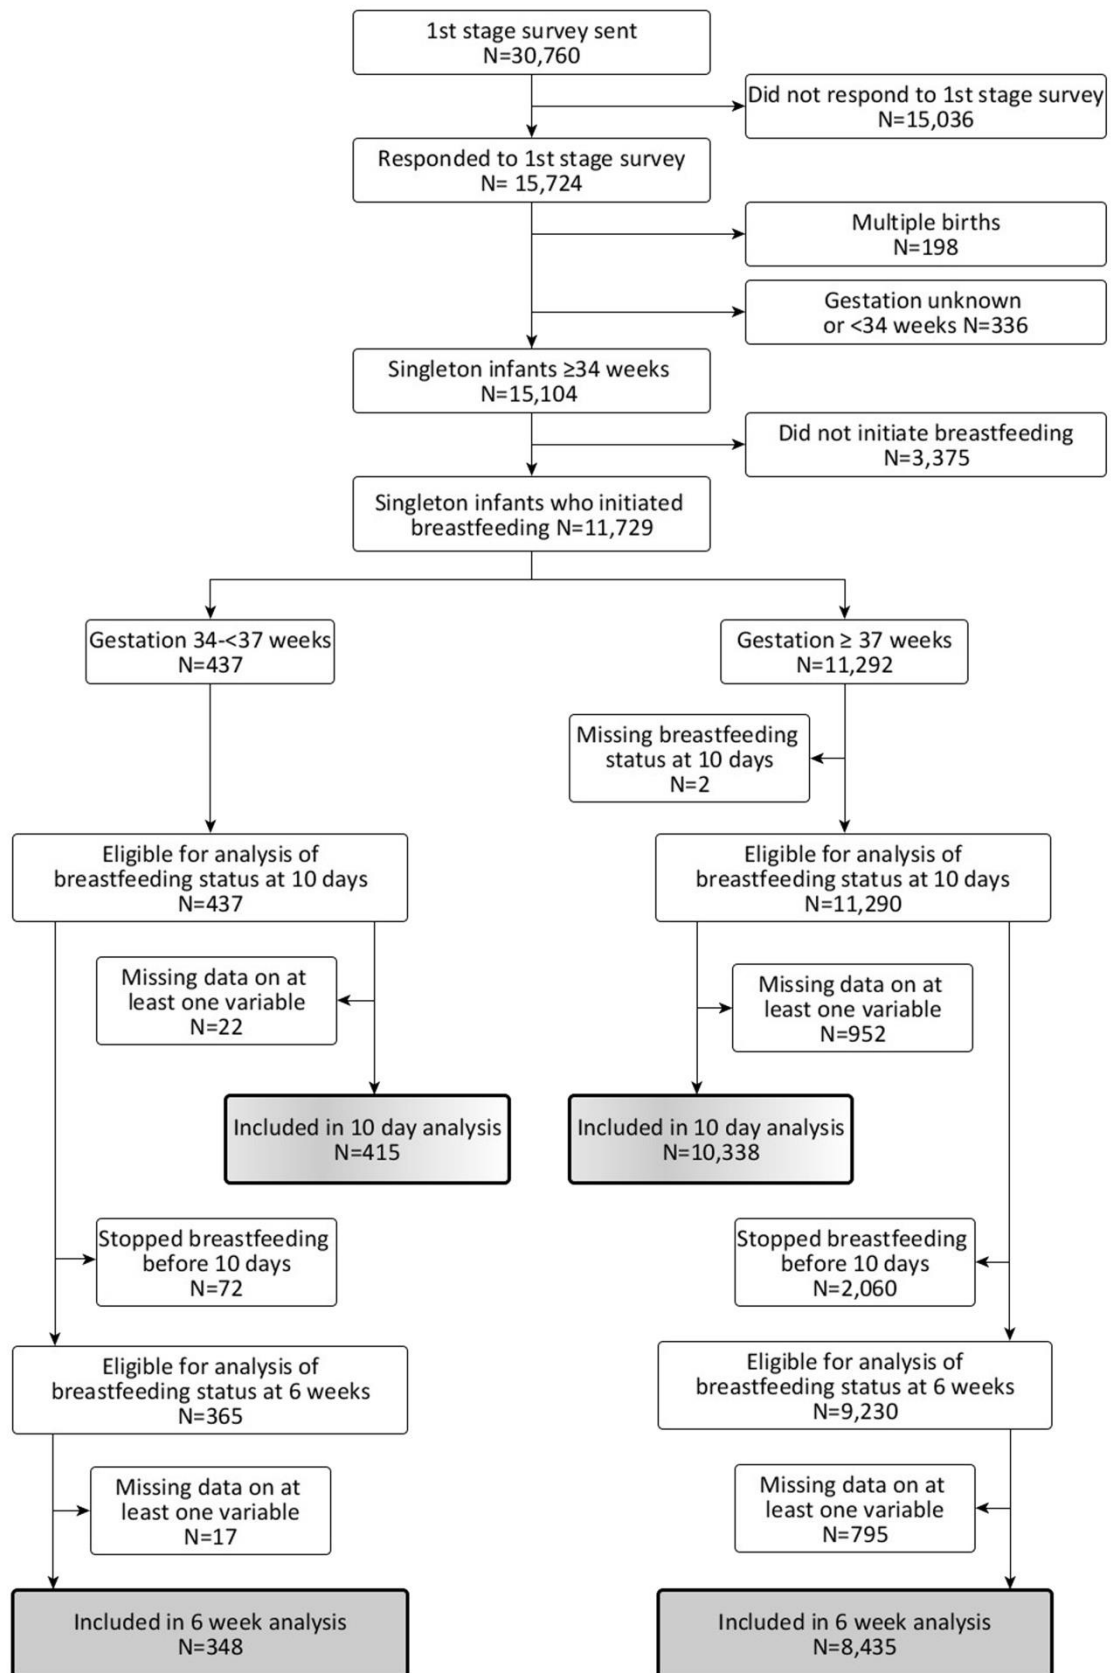

Supplement: bmjopen-2015-009144supp1.pdf [file bmjopen-2015-009144supp1.pdf]
